# Supplementary material for: COVID-19 Stress and Teachers Well-Being: The Mediating Role of Sense of Coherence and Resilience
Source: MDPI journal article supplement (doi:10.3390/ejihpe13010001), 2022-12-21
Supplement: s1 [file s1]

## Supplementary Files

### Supplementary S1-Perceived Stress Scale of COVID-19 (PSS-10-C)

| Items  | Original                                                                                                     | Amharic                                                            |
|--------|--------------------------------------------------------------------------------------------------------------|--------------------------------------------------------------------|
|        | During the last 7 days                                                                                       | ባለፉት 7 ቀናት ውስጥ                                                     |
| Item 1 | I have had the feeling that the pandemic's spread will cause something significant to occur without warning. | ከወረርሽኝ ጋር ባልታሰበ ሁኔታ አንድ ከባድ ነገር እንደሚከሰት ይሰማኛል።                     |
| Item 2 | I have felt that the pandemic has made difficult for me to control over the crucial aspects of my life.      | በወረርሽኝ ምክንያት በሕይወቴ ውስጥ አስፈላጊ ነገሮችን መቆጣጠር እንደማልችል ይሰማኛል።            |
| Item 3 | I have experienced anxiety and worry due to the pandemic                                                     | ስለ ወረርሽኝ ፍርሃት ወይም ጭንቀት ይሰማኛል።                                      |
| Item 4 | I have felt confidence in my capacity to manage any personal issues caused by the epidemic.                  | ከወረርሽኝ ጋር ተያያዘ የሚከሰቱትን የግል ችግሮችን የመቋቋም ችሎታ እንዳለኝ እርግጠኛ ነኝ ።        |
| Item 5 | I have felt optimistic that things are going well with the epidemic                                          | በወረርሽኙም፡ ውስጥ ሆነን ነገሮች በጥሩ ሁኔታ እንደሚሄዱ ብሩህ ተስፋ ይሰማኛል ።               |
| Item 6 | I have felt unable to cope with the things I have to do to monitor for a possible infection.                 | ሊመጣ ከሚችል ኢንፌክሽን ለመከላከል ማድረግ ያለብኝን ነገሮች መቋቋም እንደማልችል ይሰማኛል።         |
| Item 7 | I have felt that I can control the difficulties that could appear in my life as a result of the infection.   | በኢንፌክሽን ምክንያት በሕይወቴ ውስጥ ሊታዩ የሚችሉትን አስቸጋሪ ችግሮችን መቆጣጠር እንደምችል ይሰማኛል። |
| Item 8 | I have felt in control of the pandemic in every way.                                                         | ከወረርሽኝ ጋር በተያያዘ በሁሉም ነገር በቁጥጥር ስር እንደሆንኩ ይሰማኛል።                    |
| Item 9 | I have been upset that things related to the epidemic are out of my control.                                 | ከወረርሽኝ ጋር የተያያዙ ነገሮች ከቁጥጥሬ ውጭ በመሆናቸው ተበሳጭቻለሁ ።                     |

|         |                                                                                                                       |                                                                      |
|---------|-----------------------------------------------------------------------------------------------------------------------|----------------------------------------------------------------------|
| Item 10 | I have felt that the difficulties are increasing in these days of the epidemic and I feel unable to overcome them of. | በእነዚህ የወረርሽኝ ቀናት ውስጥ ችግሮች እየጨመሩ እንደመጡ እና እነዚህን ለማሸነፍ እንደማልችል ይሰማኛል ። |
|---------|-----------------------------------------------------------------------------------------------------------------------|----------------------------------------------------------------------|

### Scoring

| No. | Original-English |                 |                 |                  |           | Amharic Version |                 |           |                 |        |
|-----|------------------|-----------------|-----------------|------------------|-----------|-----------------|-----------------|-----------|-----------------|--------|
|     | 0= Never         | 1= almost never | 2= occasionally | 3= almost always | 4= Always | 0=በጭራሽ ማለት ይቻላል | 1=በጭራሽ ማለት ይቻላል | 2=አልፎ አልፎ | 3=ሁልጊዜ ማለት ይቻላል | 4=ሁልጊዜ |
| 1   | 0                | 1               | 2               | 3                | 4         | 0               | 1               | 2         | 3               | 4      |
| 2   | 0                | 1               | 2               | 3                | 4         | 0               | 1               | 2         | 3               | 4      |
| 3   | 0                | 1               | 2               | 3                | 4         | 0               | 1               | 2         | 3               | 4      |
| 4   | 4                | 3               | 2               | 1                | 0         | 4               | 3               | 2         | 1               | 0      |
| 5   | 4                | 3               | 2               | 1                | 0         | 4               | 3               | 2         | 1               | 0      |
| 6   | 0                | 1               | 2               | 3                | 4         | 0               | 1               | 2         | 3               | 4      |
| 7   | 4                | 3               | 2               | 1                | 0         | 4               | 3               | 2         | 1               | 0      |
| 8   | 4                | 3               | 2               | 1                | 0         | 4               | 3               | 2         | 1               | 0      |
| 9   | 0                | 1               | 2               | 3                | 4         | 0               | 1               | 2         | 3               | 4      |
| 10  | 0                | 1               | 2               | 3                | 4         | 0               | 1               | 2         | 3               | 4      |

**Note:** Items scored directly from 0 to 4 were 1, 2, 3, 6, 9, and 10; reversed scores were items 4, 5, 7, and 8 from 4 to 0 (Campo-Arias et al., 2020).

### Supplementary S2. The Brief Resilience Scale

|  | Original English Version | Amharic Version |
|--|--------------------------|-----------------|
|--|--------------------------|-----------------|

|                    |                                                                  |                                               |            |            |
|--------------------|------------------------------------------------------------------|-----------------------------------------------|------------|------------|
| 1                  | I tend to bounce back quickly after hard times                   | ከአስጨናቂ ጊዜ በኋላ በፍጥነት ወደ ነበርኩበት የመመለስ አዝማሚያ አለኝ |            |            |
| 2                  | I have a hard time making it through stressful events (R)        | በአስጨናቂ ክስተቶች ጊዜ ነገሮችን ለመቋቋም በጣም ይቸግረኛል        |            |            |
| 3                  | It does not take me long to recover from a stressful event       | ከአስጨናቂ ክስተት ለማገገም ብዙ ጊዜ አይወስድብኝም              |            |            |
| 4                  | 4. It is hard for me to snap back when something bad happens (R) | መጥፎ ነገር በሚከሰት ጊዜ ቶሎ ለመመለስ ለእኔ ከባድ ነው          |            |            |
| 5                  | I usually come through difficult times with little trouble       | ብዙውን ጊዜ በአስቸጋሪ ጊዜያት ውስጥ በትንሽ ችግር እወጣለሁ        |            |            |
| 6                  | I tend to take a long time to get over set-backs in my life (R)  | በሕይወቴ ውስጥ ወደ ትክክለኛ ህይወቴ ለመመለስ ብዙ ጊዜ ይወስድብኛል   |            |            |
| <b>Scoring</b>     |                                                                  |                                               |            |            |
| Original-English   |                                                                  | Amharic Version                               |            |            |
|                    | 1                                                                | 5                                             | 1          | 5          |
| To all items (1-7) | Strongly Disagree                                                | Strongly Agree                                | በጣም አልስማማም | በጣም እስማማለሁ |

### Supplementary S3. Sense of Coherence-13 Scale

| No. | original | Amharic |
|-----|----------|---------|
|-----|----------|---------|

|    |                                                                                                                                                              |                                                                                                                            |
|----|--------------------------------------------------------------------------------------------------------------------------------------------------------------|----------------------------------------------------------------------------------------------------------------------------|
| 1  | Do you have the feeling that you don't really care about what goes on around you?                                                                            | በአካባቢዎ ለሚከናወኑ ነገሮች ግድ የለኝም የሚል ስሜት አሎት?                                                                                    |
| 2  | Have you ever been surprised by the behavior of people you thought you knew well?                                                                            | በደንብ አውቃቸዋለሁ ብለዉ ያሰቧቸው ሰዎች ባህሪ አስገርሞዎት ያውቃል?                                                                               |
| 3  | Has it happened that people whom you counted on disappointed you?                                                                                            | እርስዎ ያመኗቸው ሰዎች ተስፋ አስቆርጦዎታል?                                                                                               |
| 4  | Until now your life has had                                                                                                                                  | እስካሁን በህይወት እኖራለሁ                                                                                                          |
| 5  | Do you have the feeling that you're being treated unfairly?                                                                                                  | ኢ-ፍትሃዊ በሆነ መንገድ እንደሚወሰድዎት ይሰማዎታል                                                                                           |
| 6  | Do you have the feeling that you are in an unfamiliar situation and don't know what to do?                                                                   | በማይታወቅ ሁኔታ እንደሆኑ እና ምን ማድረግ እንዳለበዎ የማያውቁበት ስሜት አለዎት?                                                                       |
| 7  | Doing the thing you do every day is                                                                                                                          | በየቀኑ የሚያደርጉትን ነገር ማድረግ?                                                                                                    |
| 8  | Do you have very mixed-up feelings and ideas?                                                                                                                | በጣም የተደበላለቀ ስሜቶች እና ሃሳቦች አሉዎት?                                                                                             |
| 9  | Does it happen that you have feelings inside you would rather not feel                                                                                       | በውስጥዎ ስሜቶች ቢኖርዎትም የማይሰማዎት ነገር ይከሰታል?                                                                                       |
| 10 | Many people even those with a strong character – sometimes feel like sad sacks (losers) in certain situations. How often have you felt this way in the past? | ብዙ ሰዎች ጥሩ ፀባይ ያሏቸው እንኳን አንዳንድ ጊዜ በተወሰኑ ሁኔታዎች ውስጥ የባዶነትና የሃዘን(የተሸናፊነት) ይሰማቸዋል።ከዚህ በፊት ምን ያህል ጊዜ እንደዚህ አይነት ስሜት ተሰምትዎት ያውቃል? |
| 11 | When something happened, have you generally found that?                                                                                                      | የሆነ ነገር ሲከሰትበአጠቃላይ ያንን ነገር ምን ያክል አግኝተዋል?                                                                                  |
| 12 | How often do you have the feeling that there's little meaning in the things you do in your daily life?                                                       | በእለት ተዕለት ህይወትዎ ውስጥ የሚያከናውኗቸው ነገሮች ትንሽ ትርጉም እንዳለው ምን ያህል ጊዜ ይሰማዎታል?                                                        |
| 13 | How often do you have feelings that you're not sure you can keep under control?                                                                              | በቁጥጥር ስር ማዋል እንደምትችል እርግጠኛ ያልሆንክባቸው ስሜቶች ስንት ጊዜ አለዎት?                                                                      |

## Scoring

|    | Original-English                           |                                    | Amharic Version                  |                           |
|----|--------------------------------------------|------------------------------------|----------------------------------|---------------------------|
|    | 1                                          | 7                                  | 1                                | 7                         |
| 1  | Seldom or never                            | Very often                         | አልፎ አልፎ ወይም በጭራሽ                 | በጣም ብዙ ጊዜ                 |
| 2  | Never happened                             | Always happened                    | በጭራሽ አልተከሰተም                     | ሁል ጊዜም ተከሰተ               |
| 3  | Never happened                             | Always happened                    | በጭራሽ አልተከሰተም                     | ሁል ጊዜም ተከሰተ               |
| 4  | No clear goals or purposes at all          | Very clear goals or purposes       | በጭራሽ ግልጽ ግቦች ወይም ዓላማዎች የሉም       | በጣም ግልጽ የሆኑ ግቦች ወይም ዓላማዎች |
| 5  | Very often                                 | Seldom or never                    | በጣም ብዙ ጊዜ                        | አልፎ አልፎ ወይም በጭራሽ          |
| 6  | Very often                                 | Seldom or never                    | በጣም ብዙ ጊዜ                        | አልፎ አልፎ ወይም በጭራሽ          |
| 7  | A source of deep pleasure and satisfaction | source of pain and boredom         | ጥልቅ ደስታ እና እርካታ ምንጭ              | የህመምና መሰላች ምንጭ            |
| 8  | Very often                                 | Seldom or never                    | በጣም ብዙ ጊዜ                        | አልፎ አልፎ ወይም በጭራሽ          |
| 9  | Very often                                 | Seldom or never                    | በጣም ብዙ ጊዜ                        | አልፎ አልፎ ወይም በጭራሽ          |
| 10 | Very often                                 | Seldom or never                    | በጣም ብዙ ጊዜ                        | አልፎ አልፎ ወይም በጭራሽ          |
| 11 | Over- or underestimate it's importance     | saw things in the right proportion | ከመጠን በላይ - ወይም አቅልሎ ማየት አስፈላጊ ነው | ነገሮችን በትክክለኛው መጠን ተመልክቷል  |
| 12 | Very often                                 | Seldom or never                    | በጣም ብዙ ጊዜ                        | አልፎ አልፎ ወይም በጭራሽ          |
| 13 | Very often                                 | Seldom or never                    | በጣም ብዙ ጊዜ                        | አልፎ አልፎ ወይም በጭራሽ          |

**Supplementary S4. Teacher Well-Being ( የአውንታዊ ስነ-ልቦና ለኬት)**

| Block   |    | Original English Version                                                                         | Amharic Version                                               |
|---------|----|--------------------------------------------------------------------------------------------------|---------------------------------------------------------------|
| Block 1 | A1 | How much of the time do you feel you are making progress towards accomplishing your goals?       | ግቦችን ለማሳካት ምን ያህል የጊዜ ሂደት እንደወሰደበዎት ይሰማዎታል?                   |
|         | E1 | How often do you become absorbed in what you are doing?                                          | ምን እየሰሩ ነዉ፤ምን ያህል ጊዜ ሙሉ በሙሉ በስራ ተጠምደዋል?                       |
|         | P1 | In general, how often do you feel joyful?                                                        | በአጠቃላይ ፤ምን ያህል ጊዜ ደስታ ይሰማዎታል?                                 |
|         | A2 | How often do you achieve the important goals you have set for your- self?                        | ለራስዎ ያስቀመጧቸዉን በጠማ አስፈላጊ ግቦች በምንያክል ጊዜ ያሳካሉ?                   |
| Block 2 | M1 | In general, to what extent do you lead a purposeful and meaningful life?                         | በአጠቃላይ ዓላማ እና ትርጉም ያለዉ ህይወት የሚመሩት እስከምን ድረስ ነዉ?               |
|         | R1 | To what extent do you receive help and support from others when you need it?                     | በሚፈልጉት ጊዜ ከሌሎች ምን ያህል ድጋፍና እገዛ ያገኛሉ?                          |
|         | M2 | In general, to what extent do you feel that what you do in your life is valuable and worthwhile? | በአጠቃላይ በሕይወትዎ ውስጥ የሚያደርጉት ነገሮችንም ያለው ?እንደሆነ እስከ ምን ድረስ ይሰማዎታል |
|         | E2 | In general, to what extent do you feel excited and interested in things?                         | በአጠቃላይ እስከ ምን ድረስ ደስታና የነገሮች ፍላጎት እንዳለዎት ይሰማዎታል               |
| Block 3 | P2 | In general, how often do you feel positive?                                                      | በአጠቃላይ ምን ያህል ጊዜ አውንታዊ ስሜት ይሰማዎታል                             |
|         | A3 | How often are you able to handle your responsibilities?                                          | ምን ያህል ጊዜ ኃላፊነቶችን መወጣት ይችላሉ                                   |
|         | E3 | How often do you lose track of time while doing something you enjoy?                             | የሚወዱትን ነገር ሲያደርጉ ምን ያህል ጊዜዎን ያጠፋሉ                             |
| Block 4 | R2 | To what extent do you feel loved?                                                                | ምን ያህል እንደተወደዱ ይሰማዎታል?                                        |
|         | M3 | To what extent do you generally feel you have a sense of direction in your life?                 | በአጠቃላይ ምን ያህል ሕይወትዎን የመምራት ስሜት እንዳለዎት ይሰማዎታል?                 |
|         | R3 | How satisfied are you with your personal relationships?                                          | በግል ግንኙነትዎ ምን ያህል እርካታ ይሰማዎታል?                                |

|       |                  |                                                      |                            |        |
|-------|------------------|------------------------------------------------------|----------------------------|--------|
|       | P3               | In general, to what extent do you feel<br>contented? | በአጠቃላይ ምን ያህል እርካታ ይሰማዎታል? |        |
|       | Original-English |                                                      | Amharic Version            |        |
| Block | 0                | 10                                                   | 0                          | 10     |
| 1     | Never            | always                                               | በጭራሽ                       | ሁልጊዜ   |
| 2     | not at all       | completely                                           | በጭራሽ                       | ሙሉ በሙሉ |
| 3     | Never            | always                                               | በጭራሽ                       | ሁልጊዜ   |
| 4     | not at all       | completely                                           | በጭራሽ                       | ሙሉ በሙሉ |
